# Supplementary material for: Optimising conformational effects on thermally activated delayed fluorescence
Source: Royal Society of Chemistry journal article supplement (doi:10.1039/d2tc01722a), 2022-01-01
Supplement: d2tc01722a1.pdf [file d2tc01722a1.pdf]

# Optimising Conformational Effects on Thermally Activated Delayed Fluorescence

Alessandro Landi,<sup>a\*</sup> Daniele Padula<sup>b†</sup>

<sup>a</sup>*Dipartimento di Chimica e Biologia Adolfo Zambelli, Università di Salerno, Via Giovanni  
Paolo II, I-84084 Fisciano (SA), Italy*

<sup>b</sup>*Dipartimento di Biotecnologie, Chimica e Farmacia, Università di Siena, Via A. Moro 2,  
53100 Siena, Italy*

## Supporting Information

---

\*To whom correspondence should be addressed. Email: [alelandi1@unisa.it](mailto:alelandi1@unisa.it)

†To whom correspondence should be addressed. Email: [daniele.padula@unisi.it](mailto:daniele.padula@unisi.it)

## Contents

|                                                                                            |            |
|--------------------------------------------------------------------------------------------|------------|
| <b>S1 Fermi's Golden Rule</b>                                                              | <b>S3</b>  |
| <b>S2 Franck-Condon Weighted Densities of States</b>                                       | <b>S5</b>  |
| <b>S3 Kinetic Model</b>                                                                    | <b>S7</b>  |
| <b>S4 PES Scans</b>                                                                        | <b>S7</b>  |
| <b>S5 Designed Derivatives</b>                                                             | <b>S9</b>  |
| <b>S6 Characterisation of Electronic Transitions</b>                                       | <b>S9</b>  |
| <b>S7 Comparison of TADF quantities for derivatized molecules – T<sub>1</sub> geometry</b> | <b>S11</b> |
| <b>References</b>                                                                          | <b>S11</b> |

## List of Figures

|                                                                           |     |
|---------------------------------------------------------------------------|-----|
| S1 FCWDs for PET                                                          | S5  |
| S2 FCWDs for PHT                                                          | S6  |
| S3 QM relaxed scans on S <sub>0</sub> PES                                 | S7  |
| S4 ACPM QM relaxed scans on S <sub>1</sub> and T <sub>1</sub> PES         | S8  |
| S5 Comparison of S <sub>0</sub> and S <sub>1</sub> equilibrium geometries | S9  |
| S6 Frontier molecular orbitals involved in electronic transitions         | S10 |
| S7 Dependence of M06-2X electronic properties on torsional coordinates    | S11 |

## List of Tables

|                                               |     |
|-----------------------------------------------|-----|
| S1 Kinetic Model Rates                        | S7  |
| S2 Density Functionals Analysis               | S9  |
| S3 Electronic Transitions Analysis            | S10 |
| S4 TADF properties at T <sub>1</sub> geometry | S11 |

We provide optimised geometries, and the implementation of the kinetic model at this public GitHub repository <https://github.com/dpadula85/PareTADF>.

## S1 Fermi's Golden Rule

We evaluated rate constants by first order time-dependent perturbation theory, Fermi's Golden Rule (FGR), whose general form is reported in Eq. 1 in the main text.

As discussed in the main text, FGR final form depends on the process involved,<sup>1-3</sup> i.e. non-radiative transition, spontaneous emission or absorption.

In the cases of interest here, the  $S_1 \rightarrow T_1$  transition is a non radiative transition, and the Fermi Golden Rule assumes the form:

$$k_{ij,nr} = \frac{2\pi}{\hbar} |SOC_{ij}|^2 F(\Delta E_{ij}, T). \quad (S1)$$

where  $SOC_{ij}$  is the spin-orbit coupling element,  $F(\Delta E_{ij}, T)$  is the Franck-Condon weighted density of states (FCWD) and  $\Delta E_{ij}$  is the energy difference between the two electronic states.

On the other hand, when dealing with a spontaneous emission,<sup>1,3-6</sup> the FGR rates expression is

$$k_{ij,em} = \int_{-\infty}^{+\infty} \frac{64\pi^4 \nu^3}{3hc} |\mu_{ij}|^2 F(h\nu, T) d(\hat{h}). \quad (S2)$$

where  $\mu$  is the dipole moment operator for the  $S_1 \rightarrow S_0$  transition and the integration goes over the whole frequency spectrum.

In both cases, the FCWD  $F(\Delta E_{ab}, T)$  is defined as:

$$F(\Delta E_{ab}, T) = \frac{1}{Z} \sum_{v_a, v_b} e^{-\beta E_{v_i}} |\langle v_a | v_b \rangle|^2 \delta(E_{v_b} - E_{v_a} - \Delta E) \quad (S3)$$

where  $\langle v_a | v_b \rangle$  is the Franck-Condon integral,  $Z$  is the vibrational partition function of the initial electronic state,  $\beta = 1/(k_B T)$ , and the sum runs over all vibrational states of  $|a\rangle$  and  $|b\rangle$ .

Here, we have adopted for its evaluation the generating function (GF) approach,<sup>1,2</sup> which, in the framework of harmonic approximation for nuclear motion, allows to compute  $F(\Delta E_{ab}, T)$  considering the whole set of the molecular normal modes of both initial and final states, taking into account the effects due to both changes of the equilibrium positions and of vibrational frequencies, as well as the effects due to normal mode mixing. The GF approach allows to handle the infinite summations appearing in Eq. S3 exploiting the integral representation of Dirac's delta function and Duschinsky's normal mode transformation:<sup>7</sup>

$$\mathbf{Q}_a = \mathbf{J}\mathbf{Q}_b + \mathbf{K} \quad (S4)$$

where  $\mathbf{J}$  and  $\mathbf{K}$  are the rotation matrix and the equilibrium displacement vector, respectively, while  $\mathbf{Q}_a$  and  $\mathbf{Q}_b$  are the normal coordinates of the electronic states  $|a\rangle$  and  $|b\rangle$ .

We obtained Franck-Condon weighted densities of states (FCWDs) using a development version of the MolFC package,<sup>8</sup> using (TD-)DFT/B3LYP-D3/6-31G(d) for geometry optimisations and normal modes analyses. We adopted the curvilinear coordinate representation of normal modes, to prevent that large displacements of an angular coordinate could reflect into large shifts from the equilibrium positions of the involved bond distances. Such unphysical effect is unavoidable when using rectilinear coordinates and requires the use of high order anharmonic potentials for its correction.<sup>9,10</sup>

Finally, the rates of endoergonic processes (such as rISC) are obtained from those of the reverse processes using the principle of detailed balance:<sup>11,12</sup>

$$k_{ba} = k_{ab} \times \exp\left(-\frac{\Delta E_{ba}}{k_{\text{B}}T}\right), \quad (\text{S5})$$

where  $k_{ab}$  is evaluated at  $\Delta E_{ab}$ ,  $k_{\text{B}}$  is the Boltzmann constant and  $T$  is the temperature.

## S2 Franck-Condon Weighted Densities of States

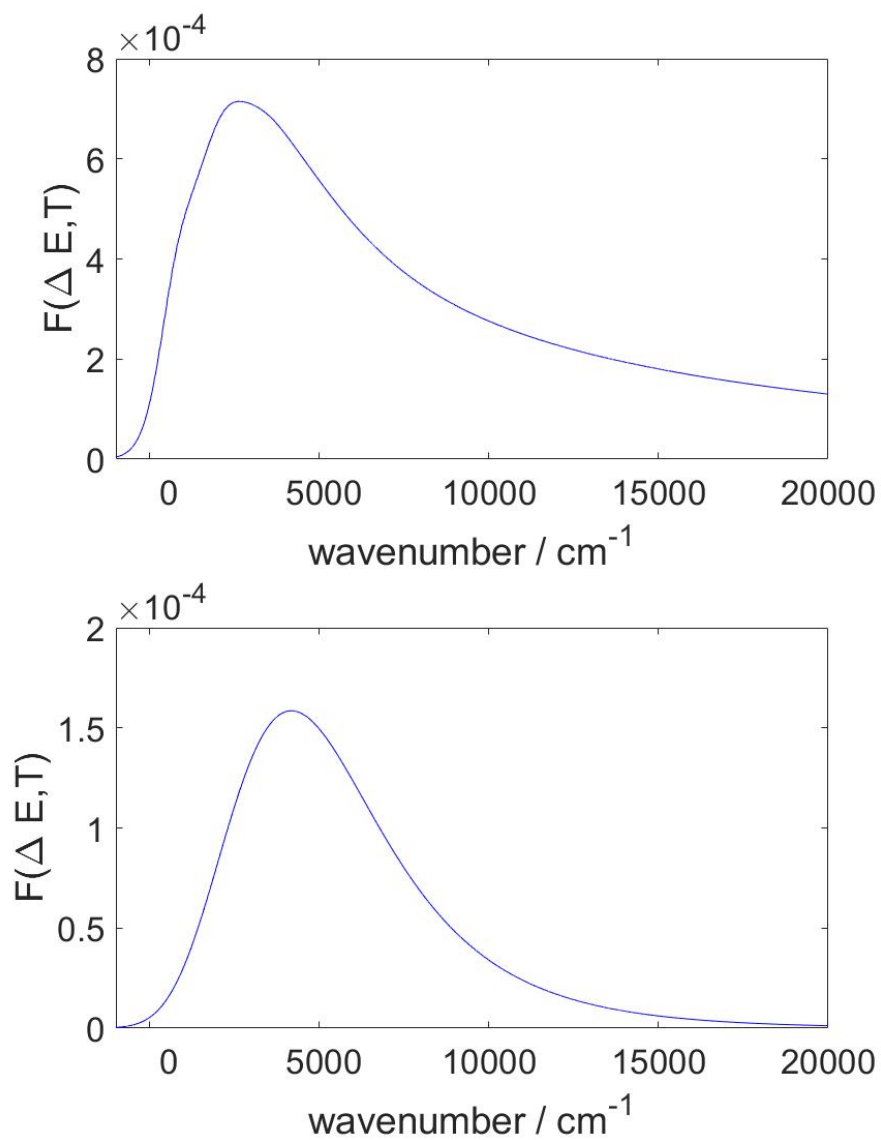

**Fig. S1:** Franck-Condon weighted densities of states at  $T = 298$  K as a function of the energy difference from the initial and the final states for the  $S1 \rightarrow T1$  transition. TOP: tn4t. Bottom: acpm.

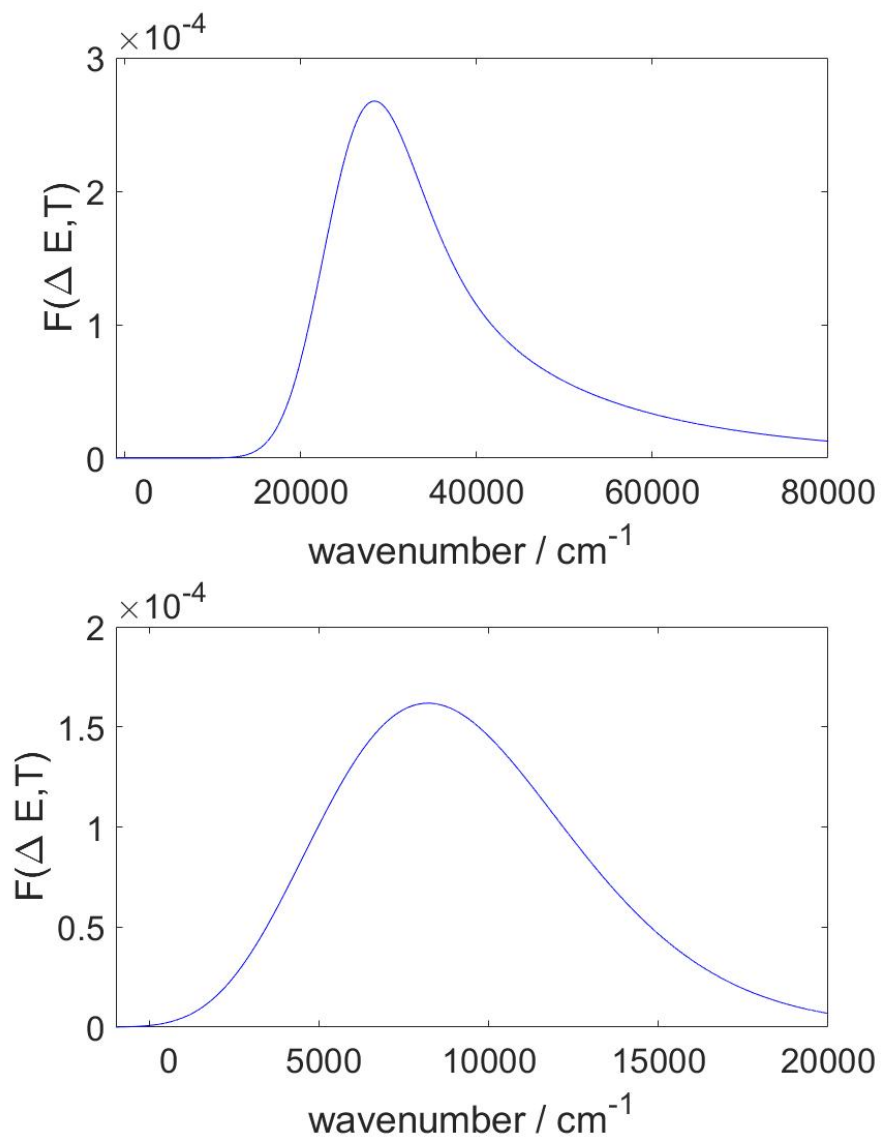

**Fig. S2:** Franck-Condon weighted densities of states at  $T = 298 \text{ K}$  as a function of the energy difference from the initial and the final states for the  $S1 \rightarrow S0$  transition. TOP: tn4t. Bottom: acpm.

### S3 Kinetic Model

| Dye            | $k_{em} / \text{s}^{-1}$ | $k_{ISC} / \text{s}^{-1}$ | $k_{rISC} / \text{s}^{-1}$ | $k_{nr} / \text{s}^{-1}$ |
|----------------|--------------------------|---------------------------|----------------------------|--------------------------|
| TN4T min       | $2.1 \times 10^9$        | $9.7 \times 10^7$         | $3.5 \times 10^2$          | $3.2 \times 10^8$        |
| TN4T opt ratio | $1.9 \times 10^8$        | $1.1 \times 10^6$         | $1.0 \times 10^6$          | $2.9 \times 10^7$        |
| ACPM min       | $6.2 \times 10^3$        | $6.9 \times 10^3$         | $4.6 \times 10^3$          | $1.2 \times 10^3$        |
| ACPM opt ratio | $1.0 \times 10^6$        | $1.0 \times 10^6$         | $8.7 \times 10^4$          | $2.0 \times 10^5$        |

**Table S1:** Rates of the processes considered for the integration of Eq. 4.

### S4 PES Scans

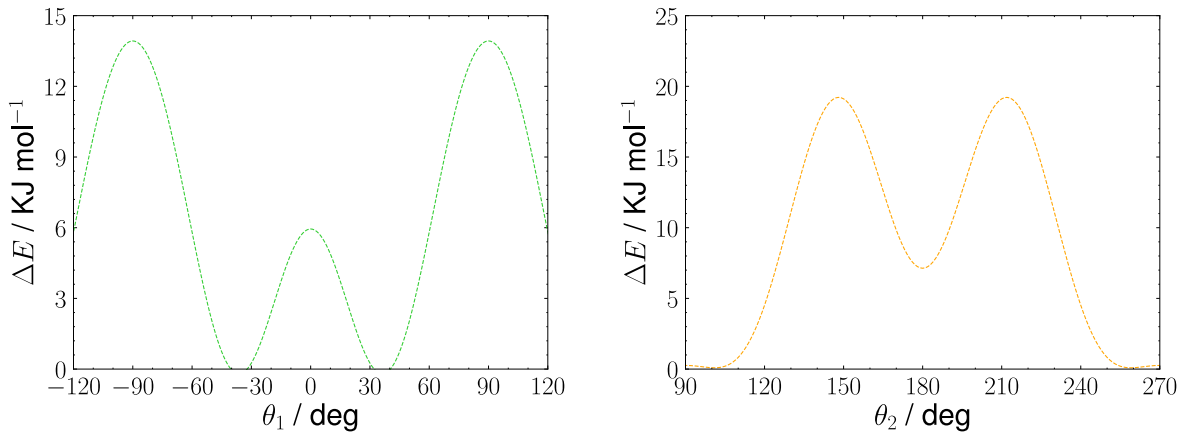

**Fig. S3:** Fit of QM relaxed scans on  $S_0$  PES along the torsional coordinates highlighted in Fig. 4 for TN4T (left) and ACPM (right) derivatives.

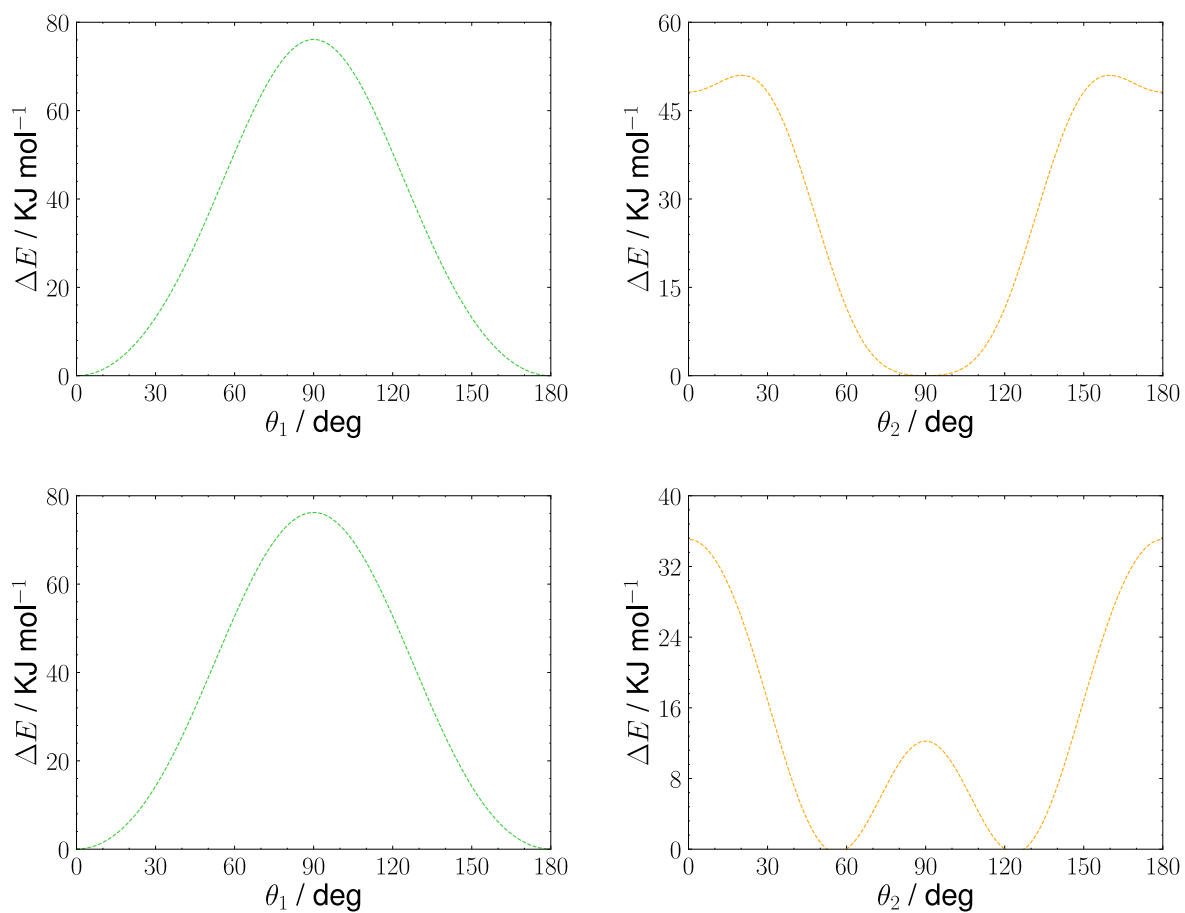

**Fig. S4:** Fit of QM relaxed scans on  $S_1$  (top) and  $T_1$  (bottom) PESs along  $\theta_1$  (left) and  $\theta_2$  (right) torsional coordinates for ACPM.



## S5 Designed Derivatives

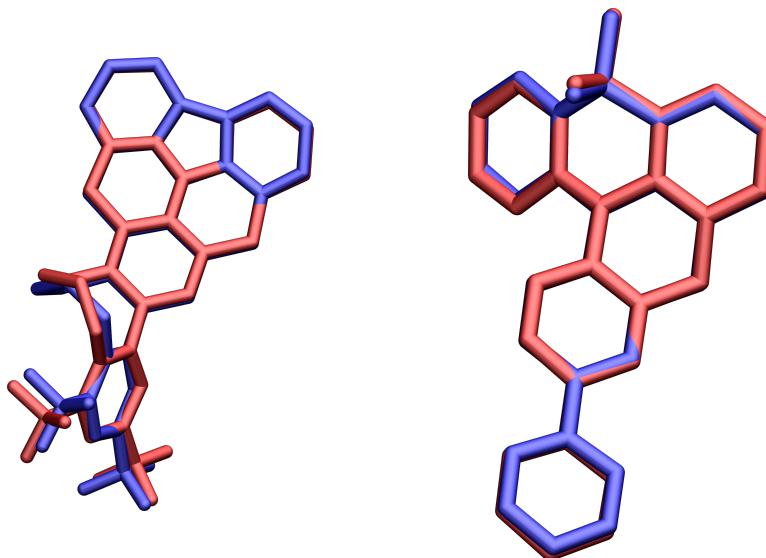

**Fig. S5:**  $S_0$  (blue) and  $S_1$  (red) minimum geometries for TN4T (left) and ACPM (right) derivatives.

## S6 Characterisation of Electronic Transitions

| Dye  | Functional      | $E_{HOMO}$ / eV | $E_{LUMO}$ / eV | $E_{S_1}$ / eV | $E_{T_1}$ / eV | $f_{S_1}$ | $\Delta E_{ST}$ / eV |
|------|-----------------|-----------------|-----------------|----------------|----------------|-----------|----------------------|
| TN4T | Expt.           | -5.76           | -2.56           | 3.13           | 3.03           |           | 0.10                 |
| TN4T | B3LYP           | -5.59           | -2.03           | 3.10           | 2.78           | 0.31      | 0.32                 |
| TN4T | M06-2X          | -6.85           | -1.25           | 3.97           | 3.39           | 0.61      | 0.58                 |
| TN4T | CAM-B3LYP       | -6.86           | -0.85           | 4.07           | 2.94           | 0.67      | 1.13                 |
| TN4T | PBE0            | -5.87           | -1.98           | 3.29           | 2.80           | 0.35      | 0.48                 |
| TN4T | $\omega$ B97X-D | -7.47           | -0.32           | 4.21           | 3.11           | 0.77      | 1.10                 |
| ACPM | Expt.           | -5.68           | -2.70           | 3.10           | 2.80           |           | 0.30                 |
| ACPM | B3LYP           | -5.11           | -1.63           | 2.89           | 2.88           | 0.0       | 0.01                 |
| ACPM | M06-2X          | -6.41           | -0.78           | 3.88           | 3.59           | 0.0       | 0.29                 |
| ACPM | CAM-B3LYP       | -6.43           | -0.40           | 4.00           | 2.97           | 0.0       | 1.03                 |
| ACPM | PBE0            | -5.38           | -1.57           | 3.08           | 2.98           | 0.0       | 0.10                 |
| ACPM | $\omega$ B97X-D | -7.03           | 0.13            | 4.17           | 3.14           | 0.0       | 1.03                 |

**Table S2:** Characterisation of electronic properties with various density functionals in combination with 6-31G\* basis set. B3LYP, CAM-B3LYP and PBE0 calculations include Grimme's dispersion correction.<sup>13</sup>

| Dye  | $E_{S_1}$ / eV | Assignment | $\Delta r_{S_1}$ / Å | $E_{T_1}$ / eV | Assignment | $\Delta r_{t_1}$ / Å |
|------|----------------|------------|----------------------|----------------|------------|----------------------|
| TN4T | 3.10           | HOMO→LUMO  | 6.53                 | 2.78           | HOMO→LUMO  | 5.94                 |
| ACPM | 2.89           | HOMO→LUMO  | 5.99                 | 2.88           | HOMO→LUMO  | 5.99                 |

**Table S3:** Analysis of electronic transitions to relevant excited states, with assignment and charge transfer metrics.<sup>14</sup>

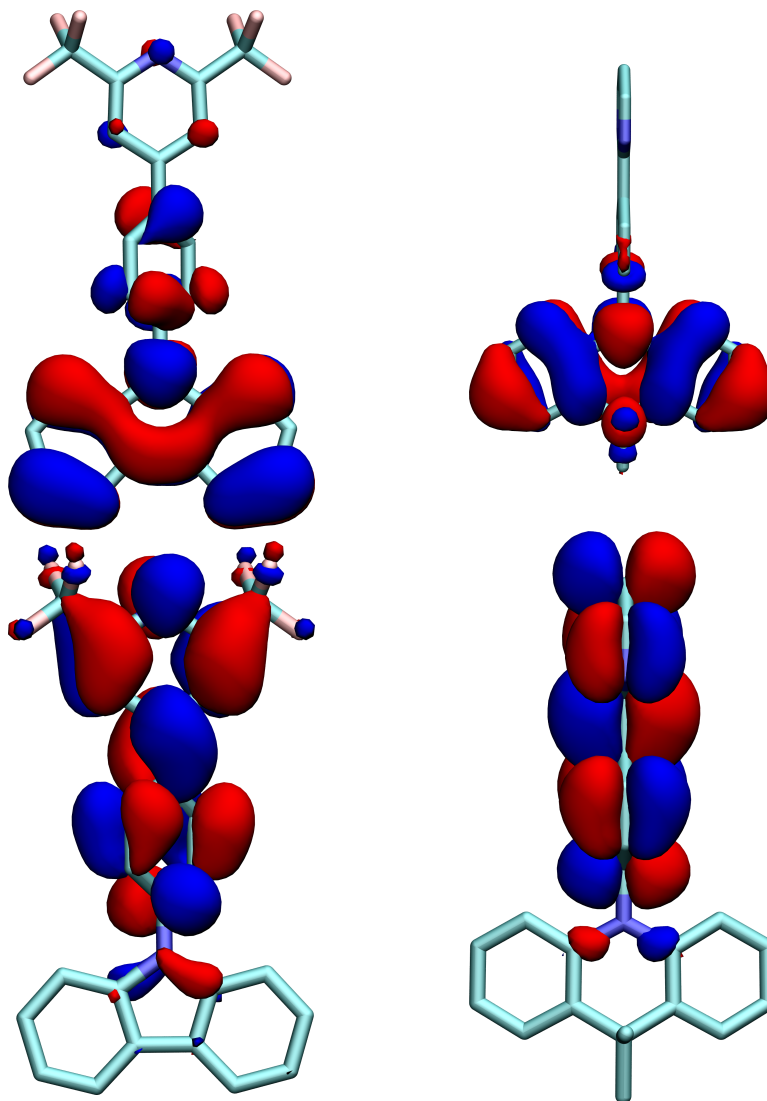

**Fig. S6:** HOMO (top) and LUMO (bottom) involved in electronic transitions for TN4T (left) and ACPM (right).

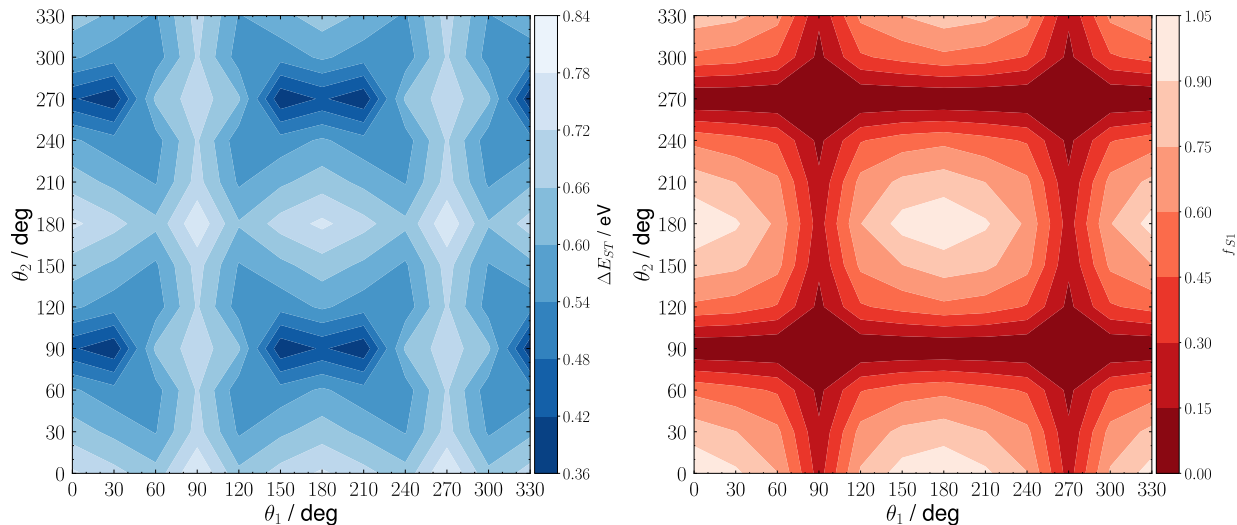

**Fig. S7:** TDDFT/M06-2X/6-31G\*  $\Delta E_{ST}$  and  $f_{S_1}$  as a function of  $\theta_1$  and  $\theta_2$  for TN4T.

## S7 Comparison of TADF quantities for derivatized molecules – $T_1$ geometry

|             | $\theta_1$ | $\theta_2$ | $\Delta E_{ST}$ / eV | $f_{S_1}$ | $\langle T_1   \hat{H}_{SO}   S_1 \rangle$ / $\text{cm}^{-1}$ | $k_{rISC}$ / $\text{s}^{-1}$ | $k_{ISC}$ / $\text{s}^{-1}$ | $k_{em}$ / $\text{s}^{-1}$ |
|-------------|------------|------------|----------------------|-----------|---------------------------------------------------------------|------------------------------|-----------------------------|----------------------------|
| TN4T min    | 0          | 44         | 0.67                 | 0.65      | 0.53                                                          | $9.45 \times 10^{-4}$        | $1.73 \times 10^8$          | $1.91 \times 10^9$         |
| TN4T planar | 0          | 0          | 0.84                 | 0.92      | 0.38                                                          | $3.56 \times 10^{-7}$        | $6.89 \times 10^7$          | $3.80 \times 10^9$         |
| TN4T deriv  | -40        | 0          | 0.61                 | 0.59      | 0.27                                                          | $2.00 \times 10^{-3}$        | $4.82 \times 10^7$          | $1.73 \times 10^9$         |
| ACPM min    | 0          | 120        | 0.41                 | 0.28      | 0.42                                                          | 2.95                         | $3.06 \times 10^7$          | $3.01e \times 10^7$        |
| ACPM planar | 0          | 0          | 0.78                 | 0.57      | 0.40                                                          | $1.44 \times 10^{-6}$        | $2.16 \times 10^7$          | $5.55 \times 10^7$         |
| ACPM deriv  | 3          | 156        | 0.81                 | 0.79      | 0.23                                                          | $1.24 \times 10^{-7}$        | $6.86 \times 10^6$          | $2.78 \times 10^7$         |

**Table S4:** Comparison of properties and rates relevant for TADF for TN4T and ACPM in their equilibrium geometry, in their planar conformation, and in the conformation forced by the proposed derivatisation. All data refer to the  $T_1$  geometry

## References

- [S1] R. Kubo and Y. Toyozawa, *Prog. Theor. Phys.*, 1955, **13**, 160–182.
- [S2] M. Lax, *J. Chem. Phys.*, 1952, **20**, 1752–1760.
- [S3] T. Pizza, *MSc thesis*, Università degli studi di Salerno, 2020.

- [S4] A. Velardo, R. Borrelli, A. Capobianco, A. Landi and A. Peluso, *J. Phys. Chem. C*, 2019, **123**, 14173–14179.
- [S5] Z. Shuai, L. Wang and C. Song, *Theory of Charge Transport in Carbon Electronic Materials*, Springer Press, 2012.
- [S6] L. Wang, G. Nan, X. Yang, Q. Peng, Q. Li and Z. Shuai, *Chem. Soc. Rev.*, 2010, **39**, 423–434.
- [S7] R. Borrelli and A. Peluso, *WIREs: Comput. Mol. Sci.*, 2013, **3**, 542–559.
- [S8] R. Borrelli and A. Peluso, *MolFC: A program for Franck-Condon integrals calculation*, Package available online at <http://www.theochem.unisa.it>.
- [S9] R. Borrelli, M. Di Donato and A. Peluso, *Biophys. J.*, 2005, **89**, 830–841.
- [S10] A. Peluso, R. Borrelli and A. Capobianco, *J. Phys. Chem. A*, 2013, **117**, 10985–10985.
- [S11] H. Sumi and T. Kakitani, *Chem. Phys. Lett.*, 1996, **252**, 85–93.
- [S12] T. Renger and R. A. Marcus, *J. Phys. Chem. A*, 2003, **107**, 8404–8419.
- [S13] S. Grimme, J. Antony, S. Ehrlich and H. Krieg, *J. Chem. Phys.*, 2010, **132**, 154104.
- [S14] C. A. Guido, P. Cortona, B. Mennucci and C. Adamo, *J. Chem. Theory Comput.*, 2013, **9**, 3118–3126.
